# Supplementary material for: Microbiota Controls the Homeostasis of Glial Cells in the Gut Lamina Propria
Source: PubMed Central journal article supplement (PMC4306542; doi:10.1016/j.neuron.2014.12.037), 2015-01-21
Supplement: mmc5.pdf [file mmc5.pdf]

## Microbiota Controls the Homeostasis of Glial Cells in the Gut Lamina Propria

### Highlights

- The glial cell network of the gut mucosa develops after birth
- Mucosal glial cells are a continuously renewed homeostatic cell population
- Microbiota regulates the development and homeostasis of mucosal glial cells

### Authors

Panagiotis S. Kabouridis, Reena Lasrado, ..., Sven Pettersson, Vassilis Pachnis

### Correspondence

p.s.kabouridis@qmul.ac.uk (P.S.K.),  
vpachni@nimr.mrc.ac.uk (V.P.)

### In Brief

Mucosal glial cells are important for maintaining the intestinal epithelial barrier and regulating immune responses in the gut. Kabouridis et al. demonstrate that signals from microbiota regulate the postnatal development and the continuous renewal of this protective cell network.

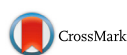

# Microbiota Controls the Homeostasis of Glial Cells in the Gut Lamina Propria

Panagiotis S. Kabouridis,<sup>1,2,\*</sup> Reena Lasrado,<sup>2</sup> Sarah McCallum,<sup>2</sup> Song Hui Chng,<sup>3,4</sup> Hugo J. Snippert,<sup>5</sup> Hans Clevers,<sup>5</sup> Sven Pettersson,<sup>3,4</sup> and Vassilis Pachnis<sup>2,\*</sup>

<sup>1</sup>William Harvey Research Institute, Queen Mary University London, London EC1M 6BQ, United Kingdom

<sup>2</sup>Division of Molecular Neurobiology, MRC National Institute for Medical Research, The Ridgeway, Mill Hill, London NW7 1AA, United Kingdom

<sup>3</sup>Lee Kong Chian School of Medicine and School of Biological Sciences, Nanyang Technological University, 50 Nanyang Avenue, Singapore 639798, Singapore

<sup>4</sup>Department of Microbiology, Tumor and Cell Biology, Karolinska Institute, 17177 Stockholm, Sweden

<sup>5</sup>Hubrecht Institute – KNAW and University Medical Centre Utrecht, 3584 CT Utrecht, The Netherlands

\*Correspondence: [p.s.kabouridis@qmul.ac.uk](mailto:p.s.kabouridis@qmul.ac.uk) (P.S.K.), [vpachni@nimr.mrc.ac.uk](mailto:vpachni@nimr.mrc.ac.uk) (V.P.)

<http://dx.doi.org/10.1016/j.neuron.2014.12.037>

## SUMMARY

The intrinsic neural networks of the gastrointestinal tract are derived from dedicated neural crest progenitors that colonize the gut during embryogenesis and give rise to enteric neurons and glia. Here, we study how an essential subpopulation of enteric glial cells (EGCs) residing within the intestinal mucosa is integrated into the dynamic microenvironment of the alimentary tract. We find that under normal conditions colonization of the lamina propria by glial cells commences during early postnatal stages but reaches steady-state levels after weaning. By employing genetic lineage tracing, we provide evidence that in adult mice the network of mucosal EGCs is continuously renewed by incoming glial cells originating in the plexi of the gut wall. Finally, we demonstrate that both the initial colonization and homeostasis of glial cells in the intestinal mucosa are regulated by the indigenous gut microbiota.

## INTRODUCTION

Glial cells encompass diverse neuroectodermal cell populations that are essential for the organization and function of the nervous system (Verkhatsky and Butt, 2007). In addition to their roles in providing support and nourishment for neurons, glial cells regulate synaptic transmission (Clarke and Barres, 2013), maintain the blood-brain barrier (Alvarez et al., 2013), and mediate communication between the nervous and immune system (Jensen et al., 2013). Consequently, glial cell deficits are associated with developmental, degenerative, and inflammatory disorders of the nervous system (Skaper et al., 2014). The enteric nervous system (ENS) encompasses the intrinsic neural circuits of the gastrointestinal tract (GI), which are organized into a vast network of interconnected ganglia distributed into two concentric layers within the gut wall, the outer myenteric (MP) and the inner submucosal (SMP) plexus (Furness, 2006). The ENS regulates most aspects of GI physiology, such as peristalsis, blood supply to the gut wall, and secretion (Furness, 2006), and consti-

tutes a relay station in the bi-directional neuro-endocrine pathways that connect the digestive system and the brain (gut-brain axis) (Collins et al., 2012). In rodents, enteric neurons are born during embryogenesis and early postnatal life and are restricted to the ganglia (Laranjeira et al., 2011; Liu et al., 2009; Pham et al., 1991). Enteric glial cells (EGCs) outnumber enteric neurons by 4:1 and are located within ganglia and extraganglionic sites, including the smooth muscle layers and the intestinal mucosa (Boesmans et al., 2015; Gershon and Rothman, 1991; Gulbransen and Sharkey, 2012; Rühl, 2005). In contrast to enteric neurogenesis, low levels of gliogenesis have been observed in enteric ganglia of unchallenged adult rodents, although the destination of the newly generated glial cells and their function remains unclear (Joseph et al., 2011). Based on morphological features and location, EGCs are subdivided into distinct subtypes that share molecular and functional characteristics (Boesmans et al., 2015; Gulbransen and Sharkey, 2012). Despite the realization that the different subpopulations of EGCs make critical and unique contributions to intestinal homeostasis, the dynamic relationship between spatially segregated EGCs, the physiological signals that regulate their steady-state equilibrium, and their response to trauma or disease remain unknown.

One of the subpopulations of EGCs that has generated considerable interest recently is located within the intestinal mucosa (Gulbransen and Sharkey, 2012; Rühl, 2005). In addition to their neuroprotective function, these mucosal EGCs (mEGCs) are thought to play crucial roles in maintaining the intestinal epithelial barrier and regulating immune responses in the mucosa (Bush et al., 1998; Neunlist et al., 2013; Rühl et al., 2004; Savidge et al., 2007). The residence of mEGCs within the most dynamic layer of the gut wall and their interactions with highly regenerative and remodeling tissues, such as the intestinal epithelium and the mucosal immune system, raise interesting questions regarding their development and homeostasis. These questions acquire renewed urgency given the emerging effects of microbiota on the organization and function of multiple GI tissues.

Here we have examined the developmental profile of mEGCs and their maintenance in adult mice. Our analysis shows that, in contrast to neural projections, mEGCs colonize the intestinal mucosa after birth. By performing inducible lineage tracing experiments we demonstrate that the network of mEGCs is maintained throughout life by the continuous supply of new glial cells

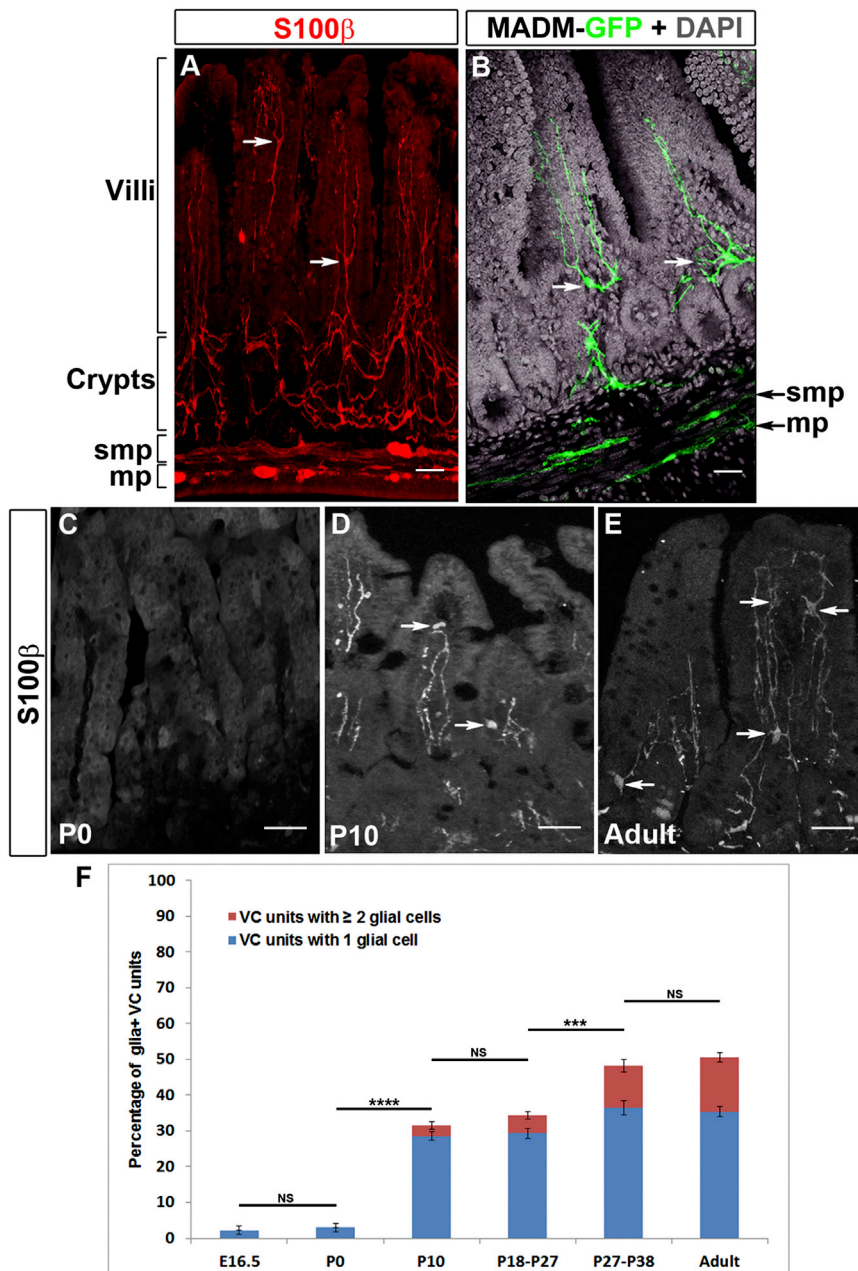

**Figure 1. The Network of mEGCs Develops after Birth**

(A) S100 $\beta$  immunostaining of a vibratome cross-section from the ileum of an adult wild-type mouse. In addition to the myenteric (mp) and submucosal plexus (smp), EGCs (arrows) are also found within the lamina propria around the crypts and within villi. (B) Highly branched GFP<sup>+</sup> glial cells (arrows) within the mucosa in the ileum of *Sox10::Cre;MADM<sup>GR/FG</sup>* mice. (C–E) S100 $\beta$  immunostaining of cryosections of the mucosa of P0 (C), P10 (D), and adult (E) mice. Arrows in (D) and (E) point to mEGCs. (F) Quantification of glia<sup>+</sup> VC units (GFP and S100 $\beta$  antibodies on sections from *Sox10::Cre;R26REYFP* mice) demonstrating that the network of mEGCs develops postnatally. Data are represented as mean of all glia<sup>+</sup> VC units  $\pm$  SEM. One-way ANOVA,  $p$  value < 0.0001; Tukey post hoc test showed that comparison of E16.5 to P0, P10 to P18–P27, and P27–P38 to Adult was not significant (NS). However, comparison of E16.5 to P10, P18–P27, P27–P38, and Adult; P0 to P10, P18–P27, P27–P38, and Adult; P10 to P27–P38 and Adult; and P18–P27 to Adult was significant (\*\*\*\* $p$  < 0.0001). Comparison of P18–P27 to P27–P38 was also significant (\*\*\* $p$  = 0.0003). The  $F$  (DFn, DFd) value is 227.6 (5, 12). Scale bars: 100  $\mu$ m (A and B); 50  $\mu$ m (C–E).

extending from the MP and SMP to the lamina propria between crypts and within villi (Figure 1A). To characterize in detail the morphology of mEGCs, we combined the *Sox10::Cre* driver (Matsuoka et al., 2005) with the *MADM-6<sup>GR</sup>* and *MADM-6<sup>FG</sup>* alleles (Zong et al., 2005) in order to express green fluorescent protein (GFP) in subsets of peripheral glial cells (Boesmans et al., 2015). mEGCs were highly branched (Figure 1B; Movie S1) and contacted several mucosal tissues, including the epithelium, blood vessels, and neurites (Figure S1; Movies S2 and S3) (Bohórquez et al., 2014; Liu et al., 2013). The apparent interaction of mEGCs with highly regenerative and remodeling tissues of the mucosa prompted us to

originate in the peripheral plexi. Finally, by analyzing germ-free (GF), conventionalized, and antibiotic-treated mice we provide evidence that the postnatal settlement of mEGCs in the intestinal mucosa and the ongoing supply of glial cells to the lamina propria in adult mice are regulated by the gut microbiota. Our work provides insight into the role of environmental factors in the development of glial cells and their homeostasis in adult animals.

## RESULTS

### The Network of mEGCs Develops after Birth

Immunostaining of sections from adult mouse intestine for the glia-specific marker S100 $\beta$  displayed a dense network of EGCs

examine their own dynamic properties. For this, we first analyzed the developmental profile of mEGCs by immunostaining intestinal sections from *Sox10::Cre;R26REYFP* reporter mice at different embryonic and postnatal stages with combinations of antibodies for S100 $\beta$ , YFP, and the neuronal marker PGP9.5. Neuronal fibers emanating from enteric ganglia were observed in ~50% of villi at embryonic stage (E) 16.5 and in the majority of villi at postnatal day (P) 0 (Figure S2). In contrast, the lamina propria along the villus-crypt (VC) units (Figure S2) was essentially devoid of glial cells at both E16.5 and P0 ( $n$  = 3; Figures 1C and 1F). The small fraction of glia<sup>+</sup> VC units identified at these stages contained a single glial cell (Figure 1F). At P10 ( $n$  = 3) the percentage of glia<sup>+</sup> VC units increased significantly and units with more

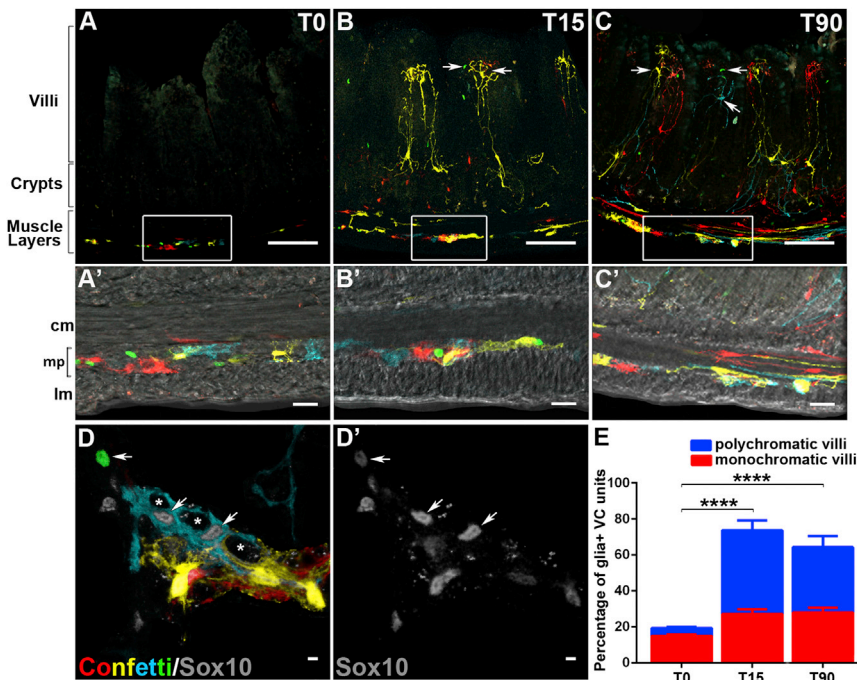

**Figure 2. Inducible Lineage Tracing of mEGCs**

Distribution of confetti<sup>+</sup> cells in the ileum of tamoxifen-treated *Sox10::CreER<sup>T2</sup>;R26RConfetti* mice at T0 (A), T15 (B), and T90 (C). Boxed areas in (A)–(C) correspond to panels (A')–(C'), respectively. (D and D') Confetti<sup>+</sup> cells in a flat-mount preparation of myenteric ganglia from *Sox10::CreER<sup>T2</sup>;R26RConfetti* mice at T0. Arrows in (D) and (D') indicate Sox10<sup>+</sup>Confetti<sup>+</sup> glial cells. Asterisks in (D) indicate the position of confetti-negative enteric neurons. (E) Quantification of VC units with confetti<sup>+</sup> glial cells at T0, T15, and T90. Data represented as mean  $\pm$  SEM. Significant differences between the ages have been obtained with the two-way ANOVA,  $p < 0.0001$ , Tukey post hoc test, \*\*\*\* $p < 0.0001$  (T0–T15; T0–T90),  $p = 0.7173$  (T15–T90). Although VC units with monochromatic glia showed no significant change in number ( $p > 0.1$ ), VC units with polychromatic glia showed significant differences: \*\*\*\* $p < 0.0001$  (T0–T15; T0–T90),  $p = 0.6222$  (T15–T90). The F(DFn, DFd) and p values for Factor 1: T0 Vs T15 Vs T90 is 29.94 (2, 18) with  $p = 0.08$ ; Factor 2: polychromatic Vs monochromatic is 3.36 (1, 18) with \*\*\*\* $p < 0.0001$  and interaction of Factor 1 with Factor 2 is 8.104 (2, 18) with \*\* $p = 0.0031$ . cm, circular muscle layer; lm, longitudinal muscle layer; mp, myenteric plexus. Scale bars: 100  $\mu$ m (A–C); 50  $\mu$ m (A'–C'); 20  $\mu$ m (D and D').

than one glial cell could also be identified (Figures 1D and 1F). These parameters increased further in adult ( $P \geq 60$ ,  $n = 3$ ) mice (Figures 1E and 1F). To examine the potential role of weaning on the maturation of the mEGC network, we quantified mEGCs in the ileum of mice whose age ranged from P18 to P38. At the time of gut harvesting, three animals (P18, P21, and P27) were still at the home cage with their mother (pre-weaning group), while the remaining (P27, P32, and P38) had been weaned 7 days earlier (post-weaning group). The average values of the pre-weaning and post-weaning groups were significantly different but very similar to those from P10 and adult animals, respectively (Figure 1F). Moreover, comparison of the values of the two animals that belong to different groups but have same age (P27) suggests that weaning contributes to the expansion of mEGCs observed after P10. Together, our experiments suggest that the mEGC network develops in response to signals associated with adaptation of the GI tract to the postnatal environment of the lumen and nutrition.

### The Network of mEGCs Is Continuously Supplied with Glial Cells Originating in the Ganglionic Plexi

Given the regenerative and remodeling capacity of the intestinal mucosa, we considered the possibility that mEGCs detected within the lamina propria at any given moment represent a snapshot in the life cycle of a highly dynamic and incessantly renewing neuroectodermal cell population. Moreover, since ganglionic EGCs are capable of responding to injury and other insults (Joseph et al., 2011; Laranjeira et al., 2011), we posited that the ganglionic plexi of the outer gut wall constitute the main source of incoming mEGCs in adult animals. To test this hypothesis directly, we performed inducible lineage tracing of EGCs in adult

mice by combining the *Sox10::CreER<sup>T2</sup>* transgene, which drives expression of tamoxifen-inducible Cre recombinase in peripheral glial cells (Laranjeira et al., 2011), with the Cre-dependent multicolor *R26R-Confetti* reporter (Snippert et al., 2010). Transgenic mice 8–12 weeks old ( $n = 4$ ) were administered tamoxifen and analyzed 4 days later (T0) to establish the baseline labeling pattern, and 15 or 90 days post-induction (T15 and T90, respectively;  $n = 4$  for each time point) to follow the fate of labeled cells. As expected, at T0 confetti<sup>+</sup> glial cells were identified within the MP and (to a lesser extent) the SMP (Figures 2A, 2A', 2D, and 2D'). However, at this stage only 18% of VC units identified on sections contained labeled glial cells and the majority of them were monochromatic displaying a single confetti<sup>+</sup> glial cell (Figures 2A and 2E). At T15 and T90, the number of confetti<sup>+</sup> cells in the plexus was similar (or sometimes even increased), suggesting that the population of glial cells labeled at T0 remains stable at least during the post-induction period analyzed (Figures 2B, 2B', 2C, and 2C'). Interestingly, at these stages numerous confetti<sup>+</sup> EGCs were found in the majority of VC units (~72% at T15 and ~65% at T90) and were distributed along the entire crypt-villus axis (Figures 2B, 2B', 2C, 2C', and 2E). In contrast to T0, the majority of confetti<sup>+</sup> VC units at T15 and T90 were polychromatic containing several glial cells labeled with different fluorescent reporters (Figures 2E and S3). The dramatic increase in the number of confetti<sup>+</sup> cells within VC units and villi and their monochromatic to polychromatic switch at T15 and T90 indicated that during the post-induction period they are colonized by multiple lineally unrelated mEGCs originating from a labeled pool of glial cells in the ganglionic plexi.

To provide further support for the centripetal flow of glial cells along the serosa-lumen axis in adult mice under physiological

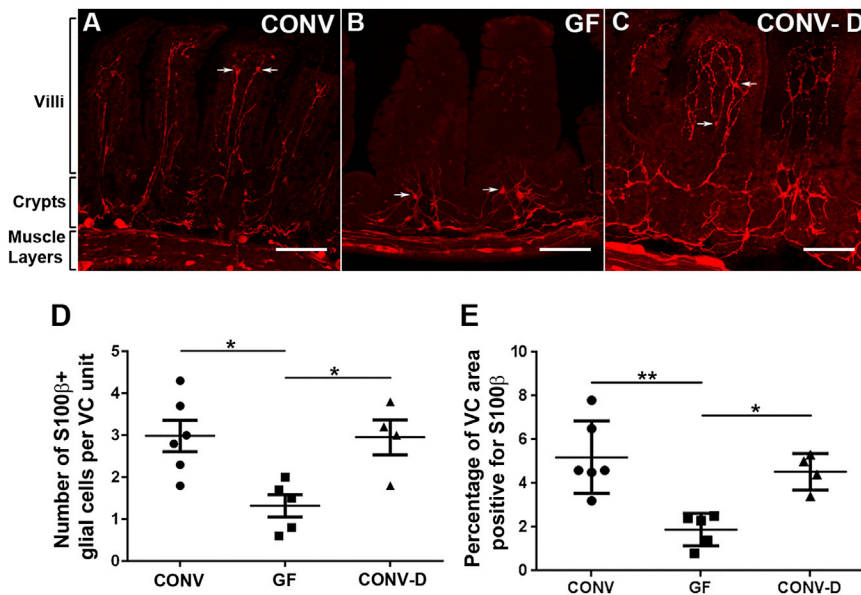

**Figure 3. Formation of the mEGC Network Depends on Microbiota**

Cross-sections from the ileum of CONV (A), GF (B), and CONV-D (C) mice immunostained for S100 $\beta$ . Arrows indicate glial cells. (D) Quantification of S100 $\beta$ <sup>+</sup> cells in the three conditions. One-way ANOVA,  $p$  value = 0.0093, Tukey post hoc test, \* $p$  = 0.0128 (CONV versus GF), \* $p$  = 0.0260 (GF versus CONV-D). Glial populations were not significantly different between CONV and CONV-D mice. The  $F(DFn, DFd)$  value is 7.086 (2, 12). (E) Percentage of VC area positive for S100 $\beta$  is represented in all three conditions. One-way ANOVA,  $p$  value < 0.05, Tukey post hoc test, \*\* $p$  = 0.002 (CONV versus GF), \* $p$  = 0.018 (GF versus CONV-D). The  $F(DFn, DFd)$  value is 10.70 (2, 12). Note that the glial cell number and distribution and the area of VC units positive for S100 $\beta$  was similar between CONV and CONV-D animals, but significantly different from GF mice. Scale bars: 100  $\mu$ m (A–C). CONV = conventional; GF = germ-free; CONV-D = conventionalized.

conditions, we combined the *hGFAP::CreER<sup>T2</sup>* transgene, which marks a relatively small subset of EGCs (Laranjeira et al., 2011), with the *R26RConfetti* and *R26REYFP* reporters. Three to four days after tamoxifen administration (T0) to 8- to 12-week-old mice from both driver-reporter combinations, sparsely labeled glial cells were detected predominantly in the MP (Figure S3). At this stage, no labeled glial cells were identified in the lamina propria (0/169 YFP<sup>+</sup> cells detected on sections from the ileum of *hGFAP::CreER<sup>T2</sup>;R26REYFP* mice;  $n$  = 4). In contrast, 8–12 weeks post-induction ~9.5% of YFP<sup>+</sup> cells were located within the mucosa (Figure S3; 24/253 YFP<sup>+</sup> cells identified;  $n$  = 4) with the remaining residing within the ganglia. Taken together, our in vivo lineage tracing experiments demonstrate that in adult mice the pool of mEGCs is continuously supplied by new cells originating from Sox10<sup>+</sup> and GFAP<sup>+</sup> glia located within the peripheral ganglia.

### Microbiota Is Required for the Postnatal Development of mEGCs

Recent work has demonstrated that the gut microbiota influences the function of neuronal circuits (Diaz Heijtz et al., 2011), but much less is known about the communication between the ENS and intestinal microflora. The GI tract is colonized immediately after birth with micro-organisms that increase in number and complexity after weaning (Nicholson et al., 2012). Since the postnatal development of mEGCs coincides with the establishment and maturation of microbiota, we examined the potential link between the two processes by comparing the mEGC network in the ileum of 8-week-old conventionally raised (CONV;  $n$  = 6) and germ-free (GF;  $n$  = 5) mice (Figure S4). Interestingly, although no obvious difference in S100 $\beta$  immunostaining was observed in the MP and SMP between the two groups, the average number and density of mEGCs in the mucosa of GF mice was significantly reduced relative to CONV animals (Figures 3A, 3B, 3D, and 3E). The reduction of mEGCs in GF mice

was not uniform along the crypt-villus axis since mEGCs were essentially eliminated from the villi but those at the level of the crypts were less affected (Figures 3A and 3B). To examine whether the requirement of the gut microbiota for normal EGC development is restricted to a critical early postnatal period, 4-week-old GF mice were conventionalized (CONV-D) by gavage feeding of microbiota and subsequent co-housing with CONV animals (Figure S4) and intestinal sections were immunostained for S100 $\beta$  4 weeks later. In comparison to GF mice, the average number of mEGCs in the mucosa of CONV-D animals ( $n$  = 4) was increased and the network of glial cells within the lamina propria of villi was restored (Figures 3B–3E). We conclude that normal development of the mEGC network depends on gut microbiota but the ability of EGCs to invade the intestinal mucosa is not restricted to the early postnatal life.

### Microbiota Regulates the Continuous Centripetal Flow of mEGCs along the Serosa-Lumen Axis

To examine whether gut microbiota is required for maintaining the normal complement of mEGCs throughout life, 8- to 12-week-old mice were treated with antibiotics for 3 weeks and the ileum was immunostained for S100 $\beta$ . Antibiotic treatment reduced the number of micro-organisms within the gut lumen and led to cecum enlargement (Reikvam et al., 2011) (Table S1; Figure S4). Importantly, it also reduced the number of S100 $\beta$ <sup>+</sup> glial cells within the mucosa (Figures 4A and 4B) with mEGCs within villi affected more relative to their counterparts around the crypts (Figures 4A and 4B). Analysis of gut sections from control and antibiotic-treated *Sox10::Cre;R26RConfetti* mice, in which all mEGCs were labeled by confetti-encoded fluorescent reporters, confirmed that antibiotic treatment reduced the number of mEGCs rather than the expression levels of the S100 $\beta$  marker (Figure S4). Finally, to examine whether antibiotics disrupt the homeostatic flow of EGCs along the plexus-crypt-villus axis, we combined antibiotic treatment and EGC lineage

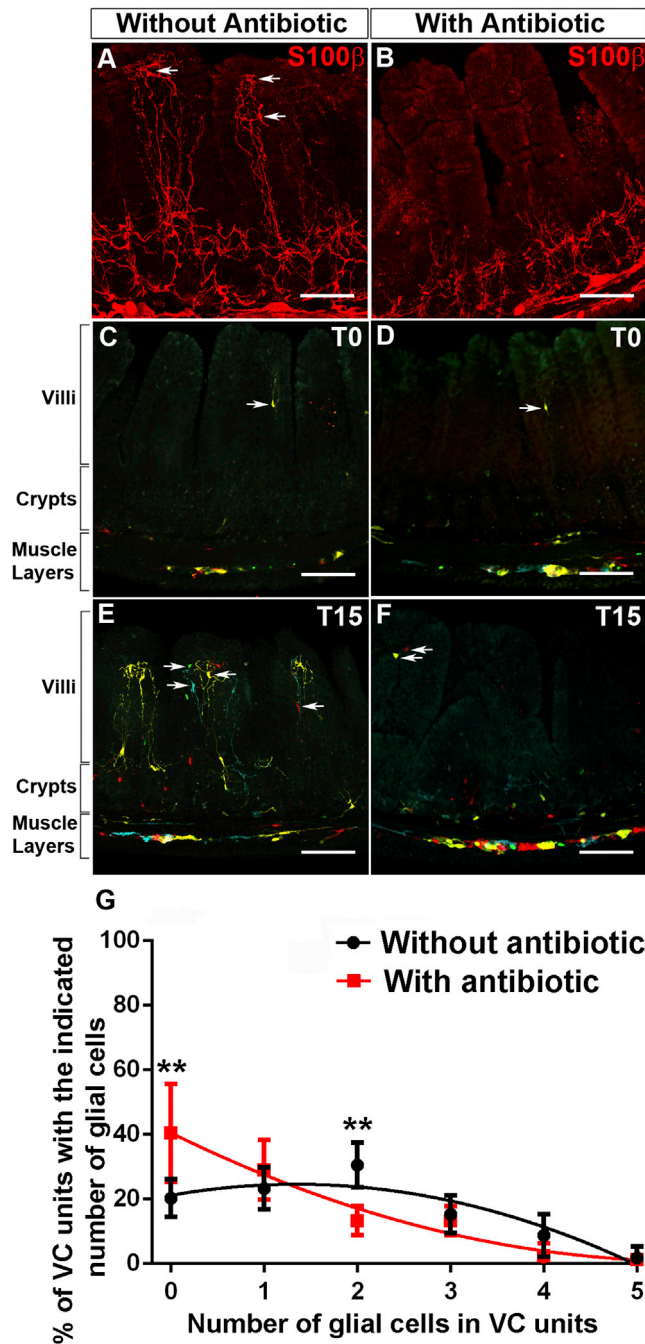

**Figure 4. Microbiota Controls the Continuous Supply of Glial Cells to the Intestinal Mucosa**

(A and B) Sections of the ileum of control (A) and antibiotic-treated (B) wild-type adult mice. Arrows in (A) indicate glial cells. (C–F) Distribution of confetti<sup>+</sup> glial cells in the ileum of tamoxifen-treated 8- to 12-week-old *Sox10::CreER<sup>T2</sup>;R26RConfetti* mice at T0 (C and D) and T15 (E and F) in the absence (C and E) or presence (D and F) of antibiotics. Arrows indicate confetti<sup>+</sup> glial cells in the lamina propria. (G) The average number of confetti<sup>+</sup> cells in VC units at T15 is reduced in antibiotic-treated animals. Data is represented as mean  $\pm$  SEM. The distribution of the number of labeled glial cells per VC unit has been plotted using the non-linear paradigm, representing a different curve for each dataset as the best fit with a \*\*\*p value = 0.0004. Using the two-way

tracing in 8- to 10-week-old *Sox10::CreER<sup>T2</sup>;R26RConfetti* mice. Administration of antibiotics resulted in dramatic reduction of the polychromatic mEGC population observed in the mucosa two weeks after tamoxifen administration (Figures 4C–4G). Taken together, these experiments argue that signals emanating from gut microbiota initiate and sustain the flow of mEGCs from the peripheral plexi to the lamina propria.

## DISCUSSION

Despite extensive literature on the self-renewal and remodeling of non-neuroectodermal intestinal tissues (Belkaid and Hand, 2014; Clevers, 2013; Stappenbeck et al., 2002), only limited information is available on the homeostasis of the intrinsic neuroglial networks of the gut wall. Indeed, the ENS is often portrayed as an assembly of ganglionic units that form during development and are maintained, perhaps unchanged, throughout life. Here we challenge this view and demonstrate that the ostensibly rigid neuroglial networks in the gut of adult animals encompass highly dynamic populations of EGCs with previously unrecognized hierarchical relationships. The extensive network of mEGCs, which develops postnatally over a period entailing dramatic changes in GI microenvironment and physiology, continues to be renewed in adult animals by incoming glial cells originating in the ganglionic plexi of the gut wall. We also demonstrate that both the initial establishment and the homeostasis of mEGCs are controlled by the gut microbiota (Figure S4).

In our lineage tracing studies, the supply of new mEGCs to the intestinal mucosa was not associated with reduction of the labeled cell population in MP and SMP, suggesting that the subset of glial cells targeted by our reporter system is long lived. It would be interesting to determine whether the continuous centripetal flow of mEGCs is supported by dedicated progenitors or differentiated glial cells, which under certain conditions acquire self-renewing potential. Irrespective of the identity of mEGC progenitors in the ganglionic plexi, our current observations provide a rationale for the constitutive gliogenesis observed in the MP of adult rodents (Joseph et al., 2011; Laranjeira et al., 2011). Consistent with our current studies and in further support of the dynamic state of EGCs in the adult gut, pharmacogenetic ablation of proliferating glial cells in mice led to epithelial barrier breakdown and inflammatory degeneration of the mucosa (Bush et al., 1998; Savidge et al., 2007).

Although the majority of neurons found in MP and SMP of adult mice are already in place by the end of fetal life, enteric neurogenesis continues for several weeks after birth (Laranjeira et al., 2011) extending beyond the early postnatal period of microbial establishment and maturation. Interestingly, GF rodents are characterized by reduction in specific subpopulation of enteric neurons and abnormal peristalsis, suggesting that microbiota influence the development and maturation of intestinal

ANOVA and Sidak's multiple comparisons test, significant differences were observed in the 0 and 2 cells per VC unit categories with \*\*p values = 0.0014 and 0.0081, respectively. The F(DFn, DFd) and p values for Factor 1: With Vs Without antibiotic is 0 (1, 36) p > 0.99; Factor 2: number of glial cells in VC units is 21.47 (5, 36) \*\*\*\*p < 0.0001 and interaction of Factor 1 with Factor 2 is 6.353 (5, 36) with \*\*\*p = 0.0003. Scale bars: 100  $\mu$ m (A–F).

neural networks (Abrams and Bishop, 1967; Collins et al., 2014; McVey Neufeld et al., 2013). Although the mechanisms by which luminal microflora impact the organization and function of enteric neural circuits remain largely unexplored, a recent study provided evidence for a reciprocal interaction between macrophages of the muscularis externa and enteric neurons that can be influenced by microbiota (Muller et al., 2014). The identification of EGCs as a major cellular target of intestinal microbiota in our study, in conjunction with the widely established roles of these cells in the survival and functional connectivity of enteric neurons, suggests that at least some of the motility defects observed in GF and antibiotic-treated rodents could be secondary to deficits in glial cell dynamics. For example, reduction of mEGCs that are associated with the projections of afferent neurons in the mucosa may result in altered input to the reflex circuitry that controls the pattern and frequency of peristaltic contractions of the gut wall.

The altered organization and properties of EGCs in GF rodents may also influence GI function independently of their effects on neural activity. Of particular interest in this context are the described roles of mEGCs in epithelial barrier function and immune responses in the intestinal mucosa (Bush et al., 1998; Neunlist et al., 2013; Rühl et al., 2004; Savidge et al., 2007). The implication of mEGCs in the function of multiple gut tissues, in conjunction with our current findings, suggests that the ongoing supply and turnover of glial cells to the lamina propria constitutes a novel microbiota-driven homeostatic mechanism essential for maintaining GI function under physiological conditions. It would be interesting to examine the dynamics of mEGCs in common inflammatory conditions of the gut (such as Crohn's disease) and whether altered homeostasis of these cells could be implicated in the pathogenesis of certain functional GI disorders (including irritable bowel syndrome) that are associated with abnormal motility (Longstreth et al., 2006) and changes in the microbial environment (De Palma et al., 2014; Mayer et al., 2014; Simrén et al., 2013). In that respect it is interesting that in our studies the network of mEGCs was restored within the intestinal mucosa upon conventionalization of GF mice at a stage beyond an early critical postnatal period. Although it is currently unclear whether this apparent plasticity of EGCs is manifested at all stages of adult life, it is conceivable that restoring glial function in patients with dysbiosis (abnormal composition of microbiome) could alleviate at least some of the dysmotility-associated symptoms.

As the ENS (and EGCs in particular) are known to express microbial pattern recognition receptors (such as TLR2 and TLR4) (Barajon et al., 2009; Brun et al., 2013), it will be of interest to determine whether microbiota control the dynamics of enteric glia directly or via an intermediary cell type. Irrespective of the mechanisms, our experiments identify EGCs as a major target of gut microbiota and suggest that microbes and their products regulate the development and maturation of other glial cell networks of the nervous system. Consistent with this view, previous studies have demonstrated transcriptome changes of differentiated astrocytes and reprogramming of Schwann cells exposed to lipopolysaccharides and leprosy bacilli, respectively (Hamby et al., 2012; Masaki et al., 2013). Changes in the organization and function of enteric glia, an essential component of a key relay

station (ENS) along the gut-brain axis, or potential deficits of CNS glia, could contribute to neuroendocrine and behavior abnormalities associated with changes in gut microbiota. Although our studies thus far have focused on the distal ileum, the identification of mEGCs in all intestinal segments, including the duodenum and the colon, suggests that homeostatic regulation of mucosal glia is a feature of the entire intestine. It will be interesting to determine whether microbiota regulates the homeostasis of mEGCs in all segments of the mammalian intestine and identify additional factors that contribute to the generation and supply of enteric glial cells to the intestinal mucosa. Understanding further the interplay between microflora and EGCs will provide an excellent model system to examine the effects of commensal and pathogenic micro-organisms on the host nervous system and help elucidate the pathogenesis and ultimately develop novel therapeutic strategies for GI disorders.

## EXPERIMENTAL PROCEDURES

Experimental Procedures are described in [Supplemental Information](#).

## SUPPLEMENTAL INFORMATION

Supplemental Information includes four figures, one table, three movies, and experimental procedures and can be found with this article online at <http://dx.doi.org/10.1016/j.neuron.2014.12.037>.

## ACKNOWLEDGMENTS

We thank members of our laboratory and Werend Boesmans for useful comments on the manuscript. The *MADM-6<sup>GR</sup>* and *MADM-6<sup>RG</sup>* alleles were kindly provided by Dr L. Luo (Stanford University). This work was supported by the Medical Research Council (UK; grant-in-aid U117537087 to VP). S.P. was supported by the Medical Research Council (Sweden) and KI-Fonder, a grant from LKC School of Medicine NTU, Singapore, and the European Union sponsored large-scale research program TORNADO.

Accepted: December 16, 2014

Published: January 8, 2015

## REFERENCES

- Abrams, G.D., and Bishop, J.E. (1967). Effect of the normal microbial flora on gastrointestinal motility. *Proc. Soc. Exp. Biol. Med.* 126, 301–304.
- Alvarez, J.I., Katayama, T., and Prat, A. (2013). Glial influence on the blood brain barrier. *Glia* 61, 1939–1958.
- Barajon, I., Serrao, G., Arnaboldi, F., Opizzi, E., Ripamonti, G., Balsari, A., and Rumio, C. (2009). Toll-like receptors 3, 4, and 7 are expressed in the enteric nervous system and dorsal root ganglia. *J. Histochem. Cytochem.* 57, 1013–1023.
- Belkaid, Y., and Hand, T.W. (2014). Role of the microbiota in immunity and inflammation. *Cell* 157, 121–141.
- Boesmans, W., Lasrado, R., Vanden Berghe, P., and Pachnis, V. (2015). Heterogeneity and phenotypic plasticity of glial cells in the mammalian enteric nervous system. *Glia* 63, 229–241. . Published online August 26, 2014.
- Bohórquez, D.V., Samsa, L.A., Roholt, A., Medicetty, S., Chandra, R., and Liddle, R.A. (2014). An enteroendocrine cell-enteric glia connection revealed by 3D electron microscopy. *PLoS ONE* 9, e89881.
- Brun, P., Giron, M.C., Qesari, M., Porzionato, A., Caputi, V., Zoppellaro, C., Banzato, S., Grillo, A.R., Spagnol, L., De Caro, R., et al. (2013). Toll-like receptor 2 regulates intestinal inflammation by controlling integrity of the enteric nervous system. *Gastroenterology* 145, 1323–1333.

- Bush, T.G., Savidge, T.C., Freeman, T.C., Cox, H.J., Campbell, E.A., Mucke, L., Johnson, M.H., and Sofroniew, M.V. (1998). Fulminant jejuno-ileitis following ablation of enteric glia in adult transgenic mice. *Cell* 93, 189–201.
- Clarke, L.E., and Barres, B.A. (2013). Emerging roles of astrocytes in neural circuit development. *Nat. Rev. Neurosci.* 14, 311–321.
- Clevers, H. (2013). The intestinal crypt, a prototype stem cell compartment. *Cell* 154, 274–284.
- Collins, S.M., Surette, M., and Bercik, P. (2012). The interplay between the intestinal microbiota and the brain. *Nat. Rev. Microbiol.* 10, 735–742.
- Collins, J., Borojevic, R., Verdu, E.F., Huizinga, J.D., and Ratcliffe, E.M. (2014). Intestinal microbiota influence the early postnatal development of the enteric nervous system. *Neurogastroenterol. Motil.* 26, 98–107.
- De Palma, G., Collins, S.M., and Bercik, P. (2014). The microbiota-gut-brain axis in functional gastrointestinal disorders. *Gut Microbes* 5, 419–429.
- Diaz Heijtz, R., Wang, S., Anuar, F., Qian, Y., Björkholm, B., Samuelsson, A., Hibberd, M.L., Forsberg, H., and Pettersson, S. (2011). Normal gut microbiota modulates brain development and behavior. *Proc. Natl. Acad. Sci. USA* 108, 3047–3052.
- Furness, J. (2006). *The Enteric Nervous System*. (Oxford: Blackwell Publishing).
- Gershon, M.D., and Rothman, T.P. (1991). Enteric glia. *Glia* 4, 195–204.
- Gulbransen, B.D., and Sharkey, K.A. (2012). Novel functional roles for enteric glia in the gastrointestinal tract. *Nat. Rev. Gastroenterol. Hepatol.* 9, 625–632.
- Hamby, M.E., Coppola, G., Ao, Y., Geschwind, D.H., Khakh, B.S., and Sofroniew, M.V. (2012). Inflammatory mediators alter the astrocyte transcriptome and calcium signaling elicited by multiple G-protein-coupled receptors. *J. Neurosci.* 32, 14489–14510.
- Jensen, C.J., Massie, A., and De Keyser, J. (2013). Immune players in the CNS: the astrocyte. *J. Neuroimmune Pharmacol.* 8, 824–839.
- Joseph, N.M., He, S., Quintana, E., Kim, Y.G., Núñez, G., and Morrison, S.J. (2011). Enteric glia are multipotent in culture but primarily form glia in the adult rodent gut. *J. Clin. Invest.* 121, 3398–3411.
- Laranjeira, C., Sandgren, K., Kessaris, N., Richardson, W., Potocnik, A., Vanden Berghe, P., and Pachnis, V. (2011). Glial cells in the mouse enteric nervous system can undergo neurogenesis in response to injury. *J. Clin. Invest.* 121, 3412–3424.
- Liu, M.T., Kuan, Y.H., Wang, J., Hen, R., and Gershon, M.D. (2009). 5-HT4 receptor-mediated neuroprotection and neurogenesis in the enteric nervous system of adult mice. *J. Neurosci.* 29, 9683–9699.
- Liu, Y.A., Chung, Y.C., Pan, S.T., Shen, M.Y., Hou, Y.C., Peng, S.J., Pasricha, P.J., and Tang, S.C. (2013). 3-D imaging, illustration, and quantitation of enteric glial network in transparent human colon mucosa. *Neurogastroenterol. Motil.* 25, e324–e338.
- Longstreth, G.F., Thompson, W.G., Chey, W.D., Houghton, L.A., Mearin, F., and Spiller, R.C. (2006). Functional bowel disorders. *Gastroenterology* 130, 1480–1491.
- Masaki, T., Qu, J., Cholewa-Waclaw, J., Burr, K., Raam, R., and Rambukkana, A. (2013). Reprogramming adult Schwann cells to stem cell-like cells by leprosy bacilli promotes dissemination of infection. *Cell* 152, 51–67.
- Matsuoka, T., Ahlberg, P.E., Kessaris, N., Iannarelli, P., Dennehy, U., Richardson, W.D., McMahon, A.P., and Koentges, G. (2005). Neural crest origins of the neck and shoulder. *Nature* 436, 347–355.
- Mayer, E.A., Savidge, T., and Shulman, R.J. (2014). Brain-gut microbiome interactions and functional bowel disorders. *Gastroenterology* 146, 1500–1512.
- McVey Neufeld, K.A., Mao, Y.K., Bienenstock, J., Foster, J.A., and Kunze, W.A. (2013). The microbiome is essential for normal gut intrinsic primary afferent neuron excitability in the mouse. *Neurogastroenterol. Motil.* 25, 183–e88.
- Muller, P.A., Koscsó, B., Rajani, G.M., Stevanovic, K., Berres, M.L., Hashimoto, D., Mortha, A., Leboeuf, M., Li, X.M., Mucida, D., et al. (2014). Crosstalk between muscularis macrophages and enteric neurons regulates gastrointestinal motility. *Cell* 158, 300–313.
- Neunlist, M., Van Landeghem, L., Mahé, M.M., Derkinderen, P., des Varannes, S.B., and Rolli-Derkinderen, M. (2013). The digestive neuronal-glia-epithelial unit: a new actor in gut health and disease. *Nat Rev Gastroenterol Hepatol* 10, 90–100.
- Nicholson, J.K., Holmes, E., Kinross, J., Burcelin, R., Gibson, G., Jia, W., and Pettersson, S. (2012). Host-gut microbiota metabolic interactions. *Science* 336, 1262–1267.
- Pham, T.D., Gershon, M.D., and Rothman, T.P. (1991). Time of origin of neurons in the murine enteric nervous system: sequence in relation to phenotype. *J. Comp. Neurol.* 314, 789–798.
- Reikvam, D.H., Erofeev, A., Sandvik, A., Grcic, V., Jahnsen, F.L., Gaustad, P., McCoy, K.D., Macpherson, A.J., Meza-Zepeda, L.A., and Johansen, F.E. (2011). Depletion of murine intestinal microbiota: effects on gut mucosa and epithelial gene expression. *PLoS ONE* 6, e17996.
- Rühl, A. (2005). Glial cells in the gut. *Neurogastroenterol. Motil.* 17, 777–790.
- Rühl, A., Nasser, Y., and Sharkey, K.A. (2004). Enteric glia. *Neurogastroenterol. Motil.* 16 (1), 44–49.
- Savidge, T.C., Newman, P., Pothoulakis, C., Rühl, A., Neunlist, M., Bourreille, A., Hurst, R., and Sofroniew, M.V. (2007). Enteric glia regulate intestinal barrier function and inflammation via release of S-nitrosoglutathione. *Gastroenterology* 132, 1344–1358.
- Simrén, M., Barbara, G., Flint, H.J., Spiegel, B.M., Spiller, R.C., Vanner, S., Verdu, E.F., Whorwell, P.J., and Zoetendal, E.G.; Rome Foundation Committee (2013). Intestinal microbiota in functional bowel disorders: a Rome foundation report. *Gut* 62, 159–176.
- Skaper, S.D., Facci, L., and Giusti, P. (2014). Mast cells, glia and neuroinflammation: partners in crime? *Immunology* 141, 314–327.
- Snippert, H.J., van der Flier, L.G., Sato, T., van Es, J.H., van den Born, M., Kroon-Veenboer, C., Barker, N., Klein, A.M., van Rheenen, J., Simons, B.D., and Clevers, H. (2010). Intestinal crypt homeostasis results from neutral competition between symmetrically dividing Lgr5 stem cells. *Cell* 143, 134–144.
- Stappenbeck, T.S., Hooper, L.V., and Gordon, J.I. (2002). Developmental regulation of intestinal angiogenesis by indigenous microbes via Paneth cells. *Proc. Natl. Acad. Sci. USA* 99, 15451–15455.
- Verkhatsky, A., and Butt, A.M. (2007). *Glial Neurobiology*. (Chichester, UK: John Wiley & Sons).
- Zong, H., Espinosa, J.S., Su, H.H., Muzumdar, M.D., and Luo, L. (2005). Mosaic analysis with double markers in mice. *Cell* 121, 479–492.



**Neuron**

**Supplemental Information**

**Microbiota Controls the Homeostasis  
of Glial Cells in the Gut Lamina Propria**

**Panagiotis S. Kabouridis, Reena Lasrado, Sarah McCallum, Song Hui Chng, Hugo J. Snippert, Hans Clevers, Sven Pettersson, and Vassilis Pachnis**

MADM-GFP + A33 + Dextran

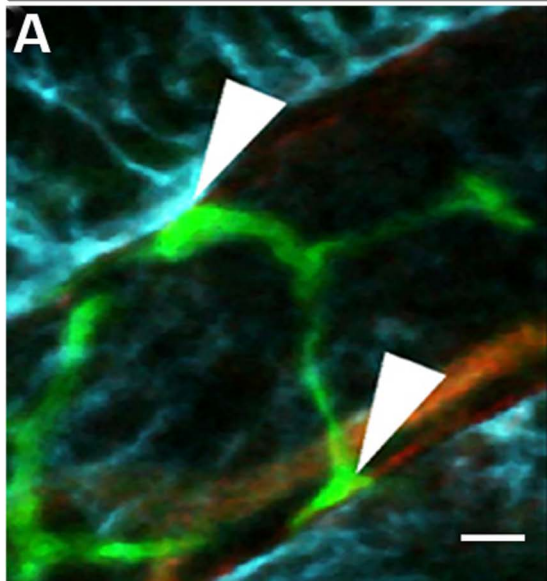

MADM-GFP + Dextran + DAPI

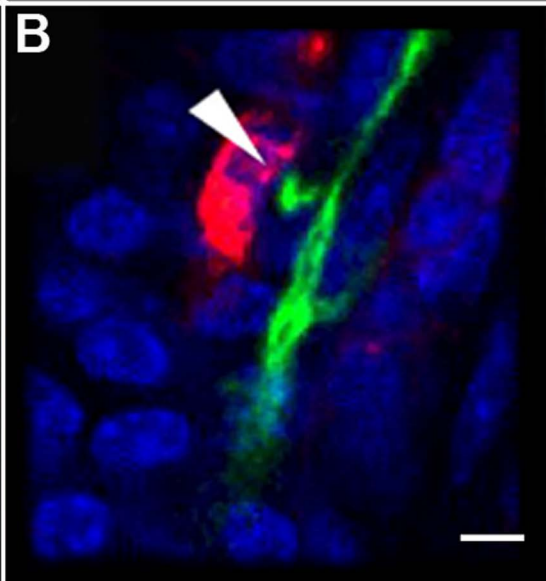

Kabouridis et al. Fig. S1 related to Fig. 1

PGP9.5 + DAPI

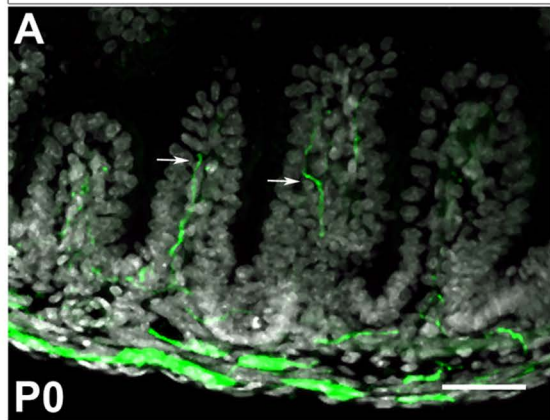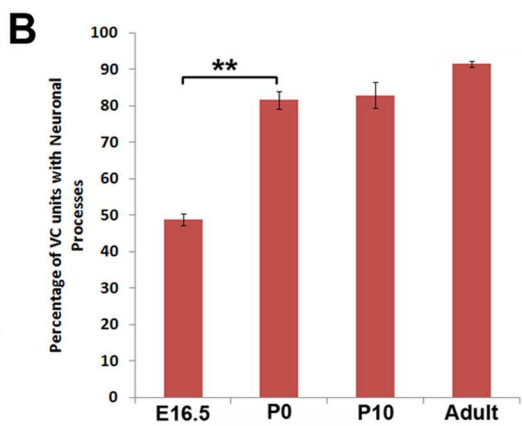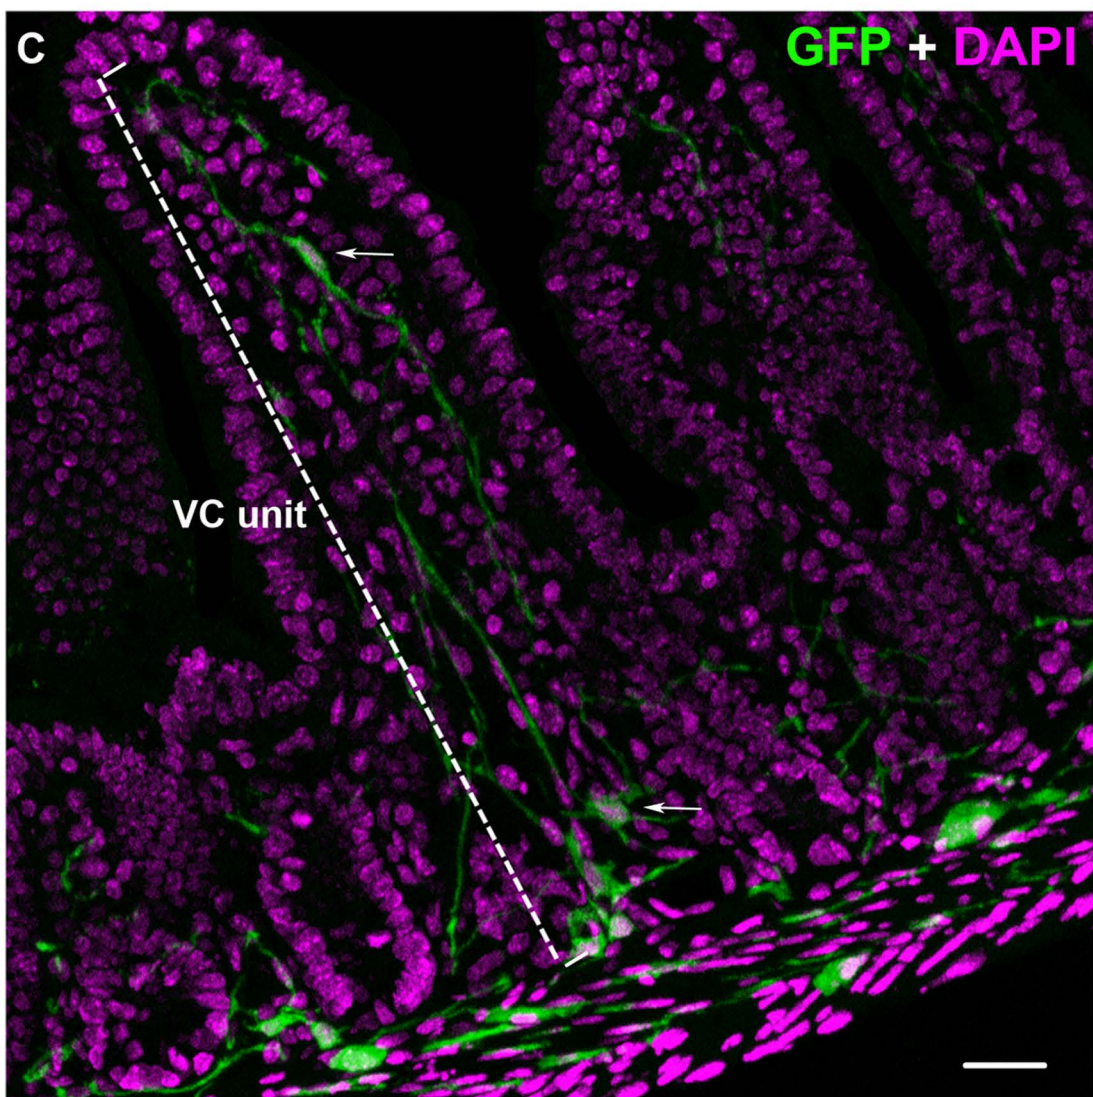

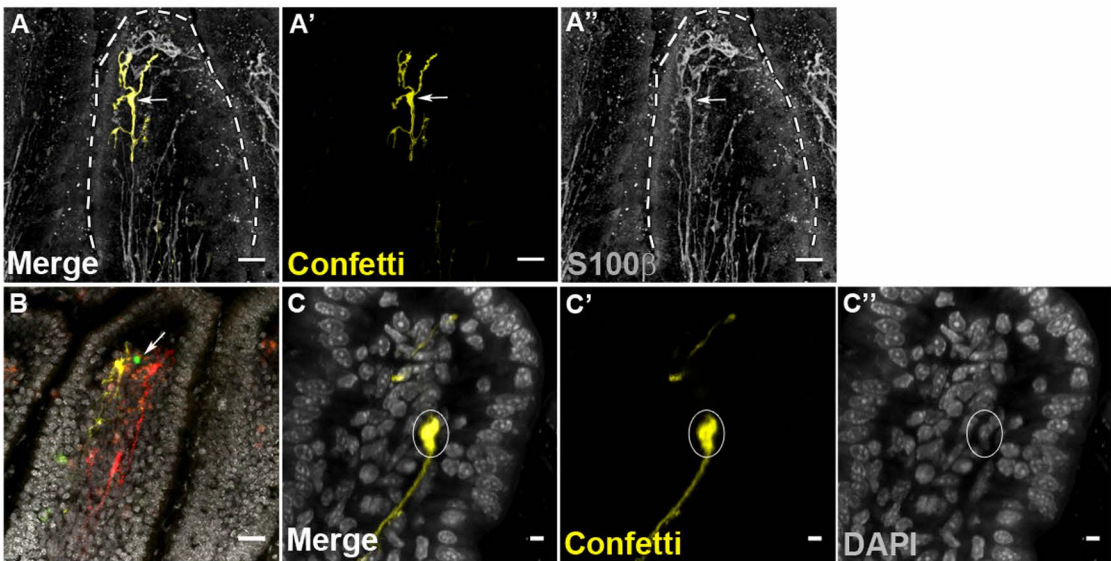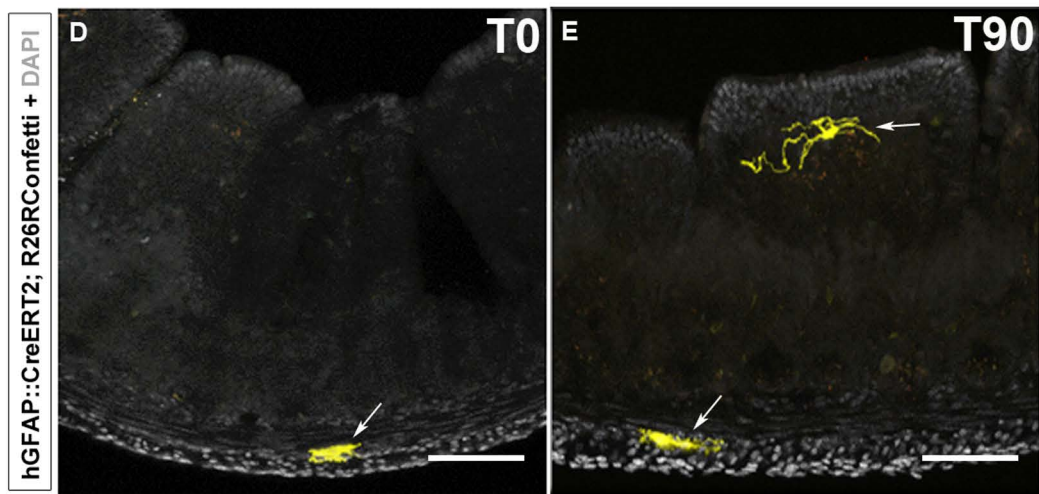

Kabouridis et al. Fig. S3 related to Fig.2

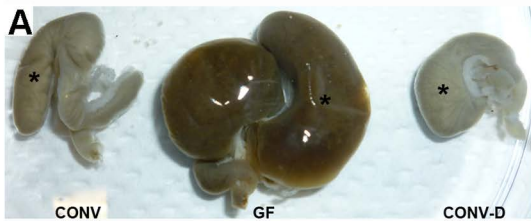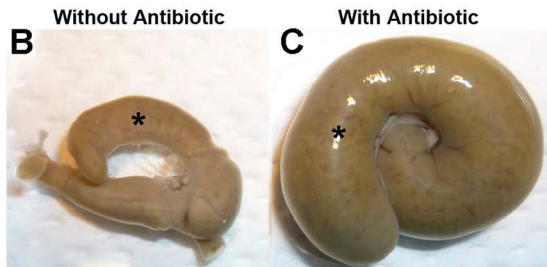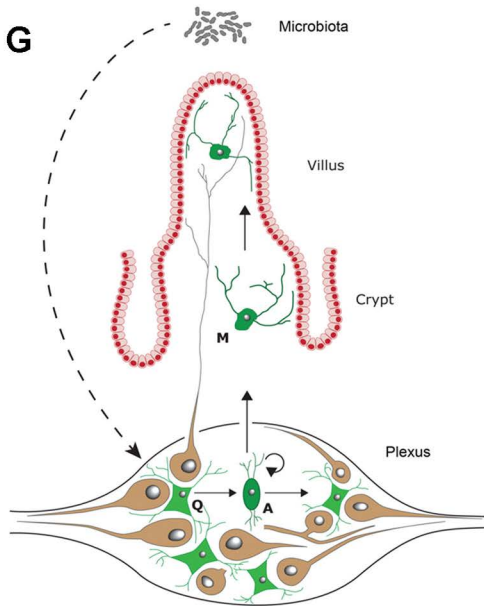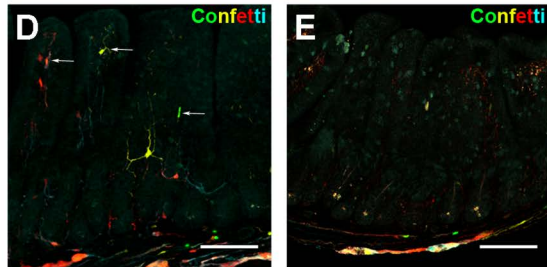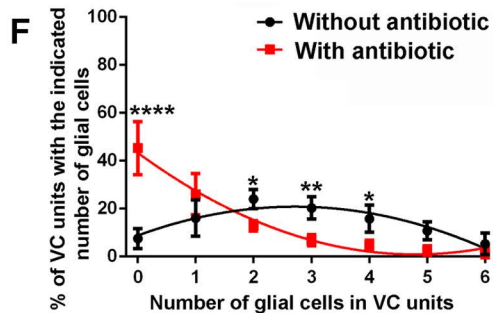

## SUPPLEMENTAL FIGURE LEGENDS

**Figure S1, related to Figure 1.** mEGCs contact multiple tissues in the intestinal mucosa.

(A, B) Glial processes (green, indicated by arrowheads) in the mucosa of *Sox10::Cre;MADM<sup>GR/RG</sup>* mice are juxtaposed to crypt epithelia (identified by A33 immunostaining; cyan) (A) and the vascular network (identified by Rhodamine Dextran; red) (B). Scale bars: 0.5 $\mu$ m.

**Figure S2, related to Figure 1.** Intestinal mucosa is innervated prior to colonization by mEGCs.

(A, B) Most villi of *Sox10::Cre;R26REYFP* P0 mice have been colonised by neuronal processes (green). Arrows in (A) indicated PGP9.5<sup>+</sup> neuronal processes. Scale bar: 100 $\mu$ m. (B) Quantification of villi with identifiable neuronal processes in the mucosa of *Sox10::Cre;R26REYFP* mice at different developmental stages. One way ANOVA, P<0.05, Tukey post-hoc test, was performed. The F (dFn, dFd) and p value is 18.12 (3, 6) with \*\*p=0.002. (C) A villus-crypt (VC) unit corresponds to the lamina propria within a clearly identifiable villus and the associated crypt area above the submucosal plexus. Image is from a cryosection of the ileum of an adult *Sox10::Cre;R26REYFP* mouse. Arrows point to mEGCs identified DAPI<sup>+</sup> nuclei and the associated GFP<sup>+</sup> cytoplasm. Scale bar: 50 $\mu$ m.

**Figure S3, related to Figure 2.** Enteric glial cells continuously colonize the lamina propria of the gut.

(A, A', A'') A YFP<sup>+</sup> cell (indicated by arrow) in a villus from the ileum of a tamoxifen-treated *Sox10::CreER<sup>T2</sup>;R26RConfetti* mouse at T15 co-expresses S100 $\beta$ . (B) A polychromatic villus from the ileum of a tamoxifen-treated *Sox10::CreER<sup>T2</sup>;R26RConfetti* mouse at T15. The presence of GFP<sup>+</sup> nuclei (arrow) among the other fluorescent-labelled cells indicates that confetti signal corresponds to glial cell processes as well as glial cell bodies. This is independently confirmed by the superimposition of DAPI<sup>+</sup> nuclei and confetti signal (C, C', C''). Scale bars: 50 $\mu$ m (A-B), 25 $\mu$ m (C-C''). (D, E) Cross sections from the gut of adult *hGFAP::CreER<sup>T2</sup>;R26RConfetti* mice injected with a single dose of tamoxifen and analysed at T0 (D) or at T90 (E). Arrows indicate isolated YFP<sup>+</sup> cells in the myenteric plexus (D) and the myenteric plexus and a villus (E). Scale bars: 100 $\mu$ m (D-E).

**Figure S4, related to Figure 3 and Figure 4.** Microbiota is required to maintain the normal complement of mEGCs in the gut lamina propria.

(A) Direct comparison of the size of ceca (asterisks) dissected from CONV (conventional), GF (germ-free) and CONV-D (conventionalized) mice. (B-E) Treatment of adult *Sox10::Cre;R26RConfetti* mice with broad spectrum antibiotics result in enlargement of cecum (B, C) and loss of Confetti<sup>+</sup> mEGCs (arrows) from the mucosa (D, E). Note the presence of Confetti<sup>+</sup> ganglia in the myenteric and submucosal plexi of antibiotic treated mice (E). (F) The average number of confetti<sup>+</sup> cells in VC units at T15 is reduced in antibiotic-treated animals. Data is represented as mean  $\pm$  SEM. The distribution of the number of labelled glial cells per VC unit has been plotted using the non-linear paradigm, representing a different curve for each data set as the best fit with p value < 0.0001. Using two-way ANOVA and Sidak's post-hoc test significant differences were observed in the 0 (\*\*\*\*p<0.0001); 2 (\*p=0.03); 3 (\*\*p=0.0067) and 4 (\*p=0.04) cells per VC unit categories. The F(DFn, DFd) and p values for Factor 1: With Vs Without antibiotic is 0 (1, 42) p>0.98; Factor 2: number of glial cells in VC units is 18.43 (6, 42) \*\*\*\*p<0.0001 and interaction of Factor 1 with Factor 2 is 23.46 (6, 42) with \*\*\*\*p<0.0001. Asterisks in panels A and B indicate the ceca. Scale bars in D-E: 100 $\mu$ m. (G) Model presenting the regulation of the homeostatic flow of glial cells from the peripheral plexus to the lamina propria of the gut mucosa. The microbiota of the gut lumen, either directly or indirectly, promote the transition of mature quiescent (Q) glial cells within the myenteric or submucosal plexi to an active (A) state which gives rise to mEGC (M) progeny that migrate into the mucosa. This model is consistent with the low levels of EGC proliferation and constitutive enteric gliogenesis that has been observed in the gut of adult rodents (Joseph et al., 2011; Laranjeira et al., 2011).

**SUPPLEMENTAL TABLE**

**Table S1**

| <b>Mice:</b>              | <b>With antibiotics</b>                   | <b>Without antibiotics</b>               |
|---------------------------|-------------------------------------------|------------------------------------------|
| <b>Microorganisms:</b>    |                                           |                                          |
| <b>Aerobic bacteria</b>   |                                           |                                          |
| 0 days                    | $4.3 \times 10^6 (\pm 3.2 \times 10^6)$   | $4.9 \times 10^6 (\pm 2.6 \times 10^6)$  |
| 10 days                   | <1                                        | $1.0 \times 10^6 (\pm 0.34 \times 10^6)$ |
| 22 days                   | <1                                        | $6.6 \times 10^5 (\pm 2.8 \times 10^5)$  |
| <b>Anaerobic bacteria</b> |                                           |                                          |
| 0 days                    | $29.8 \times 10^6 (\pm 31 \times 10^6)$   | $8.2 \times 10^6 (\pm 4.3 \times 10^6)$  |
| 10 days                   | <1                                        | $4.2 \times 10^6 (\pm 5.0 \times 10^6)$  |
| 22 days                   | <1                                        | $1.5 \times 10^6 (\pm 1.16 \times 10^6)$ |
| <b>Yeast</b>              |                                           |                                          |
| 0 days                    | $1.66 \times 10^5 (\pm 0.12 \times 10^5)$ | $1.5 \times 10^5 (\pm 0.65 \times 10^5)$ |
| 10 days                   | <1                                        | $2.0 \times 10^4 (\pm 0.65 \times 10^5)$ |
| 22 days                   | <1                                        | $1.0 \times 10^4 (\pm 1.1 \times 10^4)$  |

**Table S1, related to Figure 4.** Bacteriologic analysis of faecal pellets in control and antibiotic-treated mice. Antibiotic treatment for 10 days reduced dramatically the number of aerobic and anaerobic bacteria and yeasts. Similar reduction was also observed at the end of the 3-week antibiotic course.



## SUPPLEMENTAL MOVIES

**Movie S1, related to Figure 1. mEGCs are highly branched.** Shown is a surface-rendered reconstruction of confocal images of a single GFP<sup>+</sup> glial cell (green) in a villus of *Sox10::Cre;MADM<sup>GR/GR</sup>* mice.

**Movie S2, related to Figure 1. mEGCs are closely associated with crypts.** Shown is a surface-rendered reconstruction of confocal images of crypt epithelial cells immunostained for A33 (cyan) in close association with GFP<sup>+</sup> glial cell network (green) from the ileum of a *Sox10::Cre;MADM<sup>GR/GR</sup>* mouse. Parts of the vascular network are highlighted by Rhodamine dextran sulphate (red).

**Movie S3, related to Figure 1. mEGCs interact closely with the vascular network of villi.** Shown is a surface-rendered reconstruction of confocal images of a GFP<sup>+</sup> glial cell (green) and Rhodamine Dextran labelled microvasculature (red) in a villus of a *Sox10::Cre;MADM<sup>GR/GR</sup>* mouse.

## MATERIALS AND METHODS

### Animals

Generation of the *R26REYFP* (Srinivas et al., 2001), *R26RConfetti* (Snippert et al., 2010), *MADM-6<sup>GR</sup>* and *MADM-6<sup>RG</sup>* reporter (Tasic et al., 2012; Zong et al., 2005) and the *Sox10::CreER<sup>T2</sup>* (Laranjeira et al., 2011), *hGFAP::CreER<sup>T2</sup>* (Ganat et al., 2006) and *Sox10::Cre* (Matsuoka et al., 2005) transgenic mice have been described previously. The effect of microbiota on mEGCs was examined in wild-type C57Bl/6 mice which were raised either conventionally at specific pathogen-free conditions (CONV animals) or in germ-free isolators (GF animals). Sterility of isolators was analysed weekly by plating fecal homogenates onto different types of agar plates to detect aerobic and anaerobic bacteria and fungi. Mice maintained in GF conditions were given autoclaved food (LabDiet 5010/5021) and drinking water. Consistent with previous reports (Reinhardt et al., 2012), we consistently observed that the villi of GF mice were generally thinner relative to those from CONV animals. GF mice were conventionalised (CONV-D animals) by gavaging 100µl of homogenate generated by dissolving 2 fecal pellets from CONV animals in 1 ml of PBS. Following gavage CONV-D mice were co-housed with CONV animals. All mice were maintained in the animal facilities of NIMR (London, UK) and SingHealth Research (Singapore) in accordance with the regulatory standards of each institution and experiments were approved by the respective local ethical committees.

### Tamoxifen administration for lineage tracing of EGCs

4-OH-tamoxifen was prepared at stock concentration of 10 mg/ml in corn oil with 10% ethanol. 8-12 week old *Sox10::CreER<sup>T2</sup>;R26RConfetti* mice were administered 4-OH-Tamoxifen (0.1 mg/gram body weight) intraperitoneally for two consecutive days and analysed 4 days (T0), two weeks (T15) or three months (T90) later without additional exposure to tamoxifen. *hGFAP::CreER<sup>T2</sup>;R26RYFP* mice were induced with a single injection of 4-OH-Tamoxifen (0.1 mg/gram body weight) and analysed at the indicated stages.

### Antibiotic-induced depletion of gut microbiota

The effect of microbiota on the maintenance of mEGCs was analysed in 8-12 week-old wild-type (Parkes) and *Sox10::Cre;R26RConfetti* reporter mice that were supplied with a cocktail of broad-spectrum antibiotics in their drinking water for 3 weeks. The antibiotic cocktail consisted of ampicillin (1gr/L; Centaur Services Ltd.), metronidazole (1 gr/L; Centaur Services Ltd.), vancomycin (0.5 gr/L; Centaur Services Ltd.) and neomycin (0.5 gr/L; Sigma-Aldrich) (Reikvam et al., 2011). Drinking water was sweetened with 1% w/v of sucrose and

fresh antibiotic preparation was administered every 4 days. For the combination of EGC lineage tracing and antibiotic treatment, 8-12 week-old *Sox10::CreER<sup>T2</sup>;R26RConfetti* mice were induced with 4-OH-tamoxifen one week following addition of antibiotics to the drinking water and the distribution of labelled glial cells was analysed at T0 and T15. The effect of antibiotics on intestinal microflora was examined by quantitative analysis of aerobic and anaerobic bacteria and yeasts present in faecal pellets of *Sox10::Cre;R26RConfetti* mice. On day 0 of antibiotic treatment (prior to the addition of the antibiotic cocktail to the drinking water), on day 10 and on day 22 (conclusion of the treatment), mice defecated directly into pre-weighted sterile microcentrifuge tubes. Pellets were dissolved in PBS and 100µl of serial dilutions of faecal suspensions were plated onto duplicate horse blood agar plates for aerobic incubation (with 5% CO<sub>2</sub>), anaerobic horse blood agar plates (incubation in anaerobic chamber) and Saboraud Dextrose agar for yeast counts (air incubation). Following 3 days of incubation, plates were enumerated and the number of micro-organisms in the original sample was calculated and expressed as colony-forming units per milligram of faecal material (cfu/mg). Faecal bacterial load was determined for three mice in each of the antibiotic treatment and control groups (**Table S1**).

#### **Marking the vascular network of MADM mice**

To enable visualisation of the mucosal vascular system, *Sox10::Cre;MADM-6<sup>GR/RG</sup>* were placed briefly under a heat lamp to dilate the tail vein, which was used to inject of 50µl of 2000kDa Rhodamine Dextran (10mg/ml in PBS; Life Technologies). 5 min after injection animals were culled by cervical dislocation.

#### **Developmental profile of mEGCs**

The developmental profile of mEGCs was analysed in the ileum of *Sox10::Cre;Rosa26EYFP* mice in which all enteric neurons and glia are labelled by GFP (Laranjeira et al., 2011). Since in rodents the cell somata of enteric neurons are located exclusively within the ganglia of the myenteric and submucosal plexus, GFP<sup>+</sup> cells within the mucosa represent S100β<sup>+</sup> glial cells. Due to the extensive branching of glial cells, we used the robust cytoplasmic GFP signal in association with the nuclear marker DAPI to quantify the experiments shown in **Figure 1F**. Glial cells were quantified in the area of the lamina propria that corresponds to villus-crypt (VC) units. Each VC unit represents a clearly identifiable villus and the associated crypt area extending up to (but excluding) the submucosal and myenteric plexus (**Figure S2**). Quantification is based on analysis of at least 200 VC units from each animal and at least three animals were used for each stage. For all stages included in the developmental analysis, gut was dissected and fixed in 4% paraformaldehyde (PFA) at 4<sup>0</sup>C overnight (O/N).

Following extensive washing with PBS 1cm segment of the ileum was placed in 30% sucrose (in PBS) and incubated O/N at 4<sup>0</sup>C. Gut samples were embedded in a mix of 15% sucrose and 7.5% gelatin in PBS. When solidified at 4<sup>0</sup>C, tissue blocks were immersed in isopentane on dry ice and stored at -80<sup>0</sup>C until processed further. 14µm sections were generated using a Leica Cryostat and placed on Superfrost Plus slides. For immunostaining, sections were permeabilised with 0.3% PBT (PBS/TritonX-100) for 10 minutes and incubated with blocking solution (1% Bovine Serum Albumin and 0.15% Glycine in 0.1% PBT) for at least 1 hour. Combinations of primary antibodies were diluted as required in blocking solution and incubated O/N at 4<sup>0</sup>C. Secondary antibodies were diluted in blocking solution and applied to sections at room temperature (RT) for 2 hours. Following three washes with 0.3% PBT, slides were mounted with mounting medium containing DAPI. Primary antibodies: S100β (rabbit polyclonal from DakoCytomation), PGP9.5 (rabbit polyclonal from Serotec) and GFP (rat monoclonal, clone GF090R, from Nacalai Tesque). All primary antibodies were used at a dilution of 1:1000. Secondary antibodies were AlexaFluor564-conjugated donkey anti-rabbit (Jackson ImmunoResearch) and AlexaFluor488-conjugated donkey anti-rat (Invitrogen) and used at a dilution of 1:500.

#### **S100β immunostaining and fluorescent reporter detection in the gut of adult mice**

Ileum from 8-12 week-old mice was immersed in 4% PFA in PBS for 4 hours at RT and fixed for a further of 16 hours in 2%PFA in PBS at 4<sup>0</sup>C. Following fixation, tissue was washed extensively and either processed immediately or stored at 4<sup>0</sup>C in PBS (with 0.05% sodium azide) for up to 1 week. 4-5mm long segments from the terminal ileum were embedded in 3% agarose in PBS and sectioned with a vibratome (Leica VT1000S) to obtain 50µm sections. For imaging of fluorescent reporters (MADM-GFP, Confetti) sections were mounted directly onto slides and analysed by laser confocal microscopy. Flat-mount preparations of myenteric ganglia were generated by peeling the longitudinal muscle layer of a freshly-dissected segment of the ileum along with the attached myenteric plexus (Laranjeira et al., 2011) followed by fixation for 30 min in 4% PFA in PBS. For immunostaining, sections or peels were blocked in 5% normal donkey serum in PBS/0.5% TritonX-100 for 2 hours at RT and incubated with primary antibodies diluted in blocking solution O/N. Following extensive washing sections or peels were incubated with secondary antibodies for at least 2 hours at RT. Primary antibodies: S100β (rabbit polyclonal from DakoCytomation, 1:1000), Sox10 (rabbit polyclonal from Santa Cruz, 1:200), and GFP (rat monoclonal, clone GF090R, from Nacalai Tesque, 1:1000). Secondary antibodies were AlexaFluor 564-

conjugated donkey anti-rabbit (Jackson ImmunoResearch, 1:500) and AlexaFluor 488-conjugated donkey anti-rat (Invitrogen, 1:500).

To assess the effect of GF conditions and antibiotics on mEGCs we examine >2000 VC units from each gut analysed. In virtually all cases, glial cells were eliminated from the villi but some S100 $\beta$  cells were often observed in the lamina propria between crypts (**Figure 3B and Figure 4B**). Since the number and position of the residual glial cells varied along the crypt-villus axis, the effect of GF conditions and antibiotic treatment was quantified by counting the number of S100 $\beta$ <sup>+</sup> glial cells present along the entire length of ~100 randomly identified VC units. To determine the area of VC units occupied by glial cells images of S100 $\beta$  immunostainings were converted into binary images (8-bit grayscale) with ImageJ and the area of individual VC units was selected. The S100 $\beta$  area scoring above the set threshold was expressed as fraction of the total area selected using the Measure command under the Analyse tool. An average value of the VC unit measurements was calculated for every mouse in each group.

#### **Confocal microscopy and image analysis**

Confocal images of adult gut cryostat (14 $\mu$ m) and vibratome (50 $\mu$ m) sections were acquired with Leica TCS SP5 with a DN6000 microscope assisted by the LAS AF software. The objective lenses used included a dry X20 (0.75 NA), Nose-dip X20 (1.0 NA) and an oil-immersion X40 (1.75 NA). Sequential scans were performed in for XFP excitations: nuclearGFP, the argon laser 488 nm line; for EYFP 514 nm line; for RFP a red diode laser emitting at 561 nm, and blue mCFP was excited using a laserline at 458 nm. In general GFP fluorescence was collected between 498–510nm, airy 1; EYFP fluorescence was collected between 521–560 nm, airy 1; RFP fluorescence was collected between 590–650 nm, airy 1; mCFP fluorescence was collected between 466–495 nm, airy 1.5. DIC was obtained while using 488 nm laser through transmission gate. All images were processed with either Adobe Photoshop CS4 (Adobe Systems) or ImageJ (Wayne Rasband, NIH). 3-D reconstructions and movies were generated using the 3D opacity mode in Volocity (Perkin Elmer, Waltham, MA).

#### **Quantification and Statistical Analysis**

Data have been obtained from at least three independent animals. N values have been mentioned in the text/figure legends. Data are mainly presented as mean  $\pm$  standard error of the mean (SEM) unless otherwise mentioned. All error bars represent SEM. Statistical analysis was performed with GraphPad Prism 6 (GraphPad Software) and Microsoft Excel

(Microsoft). Significant differences between data sets have been obtained with different tests as mentioned in the figure legends.

## REFERENCES

- Ganat, Y.M., Silbereis, J., Cave, C., Ngu, H., Anderson, G.M., Ohkubo, Y., Ment, L.R., and Vaccarino, F.M. (2006). Early postnatal astroglial cells produce multilineage precursors and neural stem cells in vivo. *J Neurosci* *26*, 8609-8621.
- Joseph, N.M., He, S., Quintana, E., Kim, Y.G., Nunez, G., and Morrison, S.J. (2011). Enteric glia are multipotent in culture but primarily form glia in the adult rodent gut. *J Clin Invest* *121*, 3398-3411.
- Laranjeira, C., Sandgren, K., Kessar, N., Richardson, W., Potocnik, A., Vanden Berghe, P., and Pachnis, V. (2011). Glial cells in the mouse enteric nervous system can undergo neurogenesis in response to injury. *J Clin Invest* *121*, 3412-3424.
- Matsuoka, T., Ahlberg, P.E., Kessar, N., Iannarelli, P., Dennehy, U., Richardson, W.D., McMahon, A.P., and Koentges, G. (2005). Neural crest origins of the neck and shoulder. *Nature* *436*, 347-355.
- Reikvam, D.H., Erofeev, A., Sandvik, A., Grcic, V., Jahnsen, F.L., Gaustad, P., McCoy, K.D., Macpherson, A.J., Meza-Zepeda, L.A., and Johansen, F.E. (2011). Depletion of murine intestinal microbiota: effects on gut mucosa and epithelial gene expression. *PloS one* *6*, e17996.
- Reinhardt, C., Bergentall, M., Greiner, T.U., Schaffner, F., Ostergren-Lunden, G., Petersen, L.C., Ruf, W., and Backhed, F. (2012). Tissue factor and PAR1 promote microbiota-induced intestinal vascular remodelling. *Nature* *483*, 627-631.
- Snippert, H.J., van der Flier, L.G., Sato, T., van Es, J.H., van den Born, M., Kroon-Veenboer, C., Barker, N., Klein, A.M., van Rheenen, J., Simons, B.D., *et al.* (2010). Intestinal crypt homeostasis results from neutral competition between symmetrically dividing Lgr5 stem cells. *Cell* *143*, 134-144.
- Srinivas, S., Watanabe, T., Lin, C.S., William, C.M., Tanabe, Y., Jessell, T.M., and Costantini, F. (2001). Cre reporter strains produced by targeted insertion of EYFP and ECFP into the ROSA26 locus. *BMC Dev Biol* *1*, 4.
- Tasic, B., Miyamichi, K., Hippenmeyer, S., Dani, V.S., Zeng, H., Joo, W., Zong, H., Chen-Tsai, Y., and Luo, L. (2012). Extensions of MADM (mosaic analysis with double markers) in mice. *PloS one* *7*, e33332.
- Zong, H., Espinosa, J.S., Su, H.H., Muzumdar, M.D., and Luo, L. (2005). Mosaic analysis with double markers in mice. *Cell* *121*, 479-492.
